# Supplementary material for: Metformin-encapsulating immunoliposomes conjugated with anti-TROP 2 antibody fragments for the active targeting of triple-negative breast cancer
Source: Royal Society of Chemistry journal article supplement (doi:10.1039/d4nr03224a), 2024-12-24
Supplement: d4nr03224a1.pdf [file d4nr03224a1.pdf]

## Metformin encapsulating immunoliposomes conjugated with anti-TROP 2 antibody fragments for the active targeting of triple negative breast cancer

Daiva Vozgirdaite<sup>1</sup>, Emilie Allard-Vannier<sup>1</sup>, Florence Velge-Roussel<sup>1</sup>, Emmanuel Douez<sup>1,2</sup>, Louis Jolivet<sup>3</sup>, Fanny Boursin<sup>3</sup>, Igor Chourpa<sup>1</sup>, Nicolas Aubrey<sup>3</sup>, Katel Hervé-Aubert<sup>1\*</sup>

<sup>1</sup>UPR 4301 CBM, CNRS, NMNS Department, University of Tours, 37200 Tours, France

<sup>2</sup>Pharmacy Department, University Hospital Center of Tours, 37200 Tours, France

<sup>3</sup>ISP UMR 1282, INRA, BioMAP team, University of Tours, 37200 Tours, France

\*Corresponding author: [katel.herve@univ-tours.fr](mailto:katel.herve@univ-tours.fr)

### Supplementary information

**Table S1.** Met-ImmunoLP 3 characterization in terms of physical properties after incubation in FCS. The data is expressed as an average  $\pm$  SD (n = 3).

| Inucbation time in FCS | D <sub>H</sub> (nm) | Pdl              | ζ (mV)          |
|------------------------|---------------------|------------------|-----------------|
| 24 h                   | 162.4 $\pm$ 1.9     | 0.236 $\pm$ 0.01 | -16.6 $\pm$ 1.7 |
| 72 h                   | 152.3 $\pm$ 2.6     | 0.225 $\pm$ 0.01 | -14.7 $\pm$ 1.2 |
| 96 h                   | 160.2 $\pm$ 1.9     | 0.256 $\pm$ 0.01 | -18.1 $\pm$ 0.7 |

**Abbreviations:** D<sub>H</sub>, average hydrodynamic diameter; FCS, fetal calf serum; Pdl, polydispersity index; ζ, zeta potential

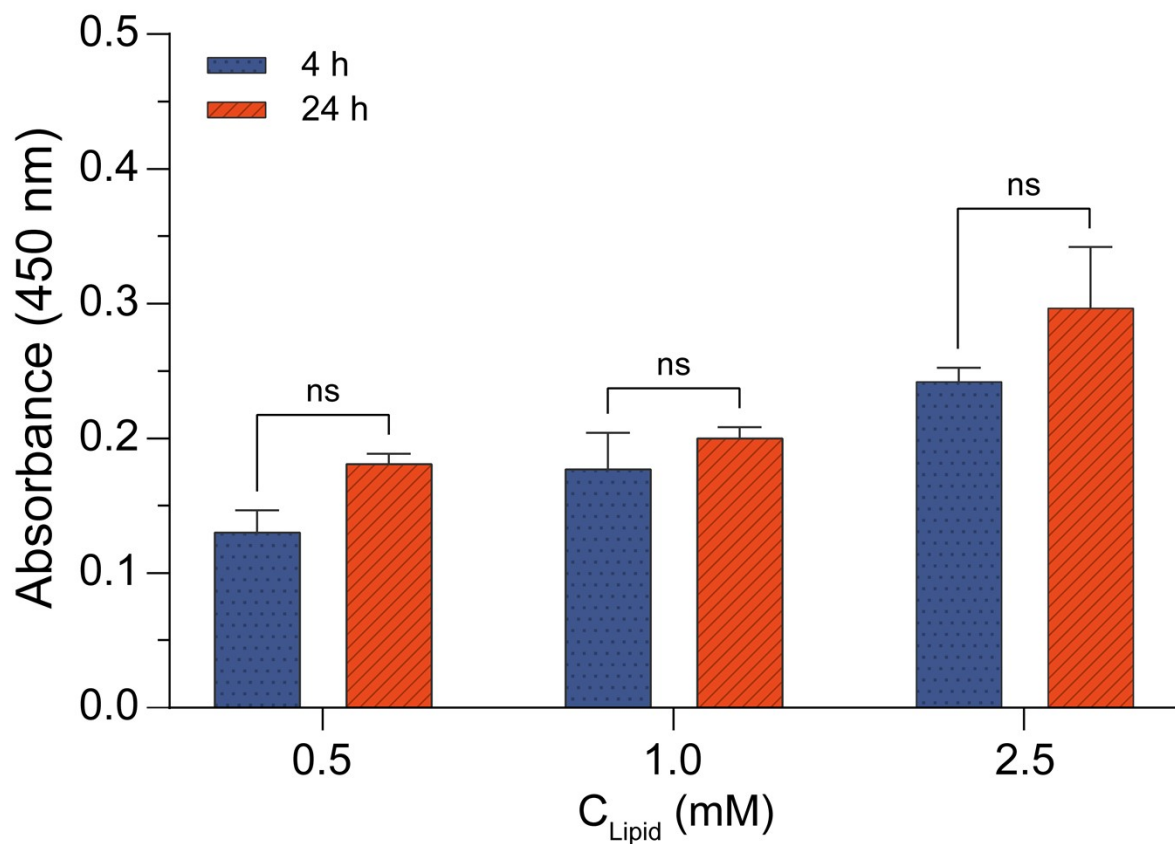

**Figure S1.** Indirect ELISA test showing the immunoreactivity of Met-ImmunoLPs 3 after incubation in FCS during 2 h and 24 h, in binding the TROP 2 protein, measured at varied lipid concentrations. The data is expressed as an average  $\pm$  SD ( $n = 3$ ). Statistical information was obtained using two-way ANOVA test (ns  $p > 0.05$ , \*  $p < 0.05$ ).

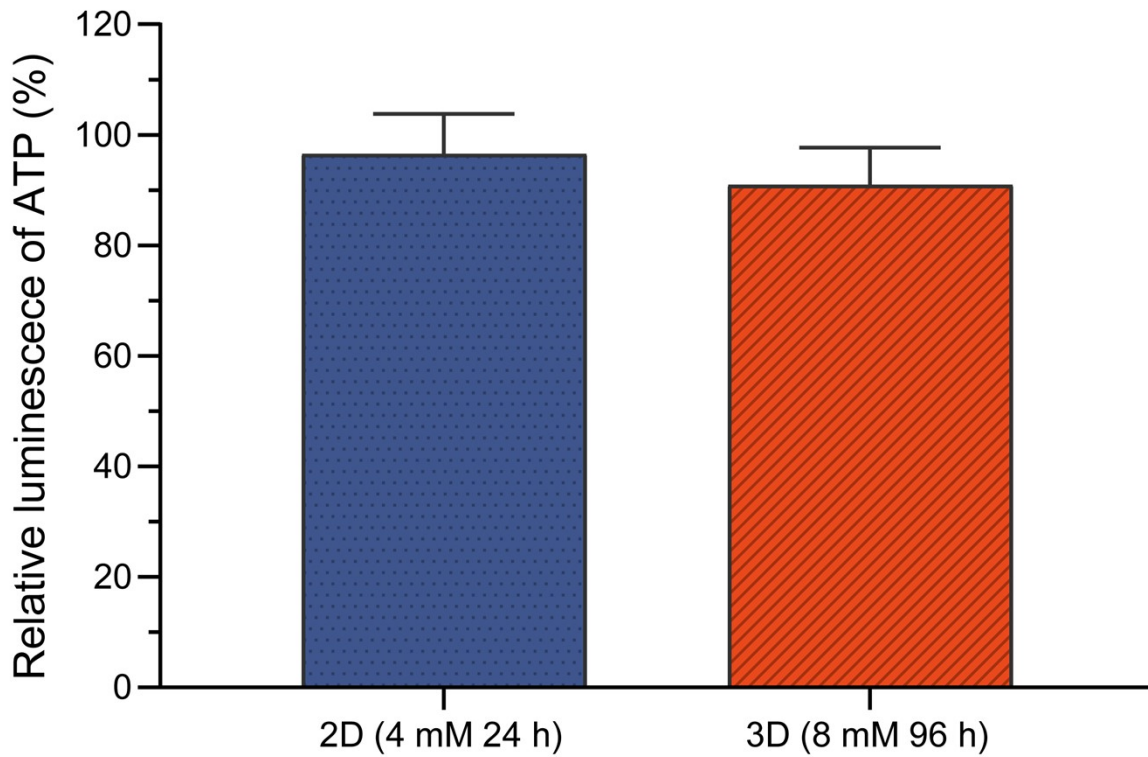

**Figure S2.** The effect of ImmunoLP, on the ATP expression of MDA-MB-468 cells cultured in 2D and 3D models. In the 2D model the cells, seeded at  $5 \times 10^3$  cells/well, were treated 24 h with 4 mM ImmunoLPs during 24 h. In the 3D models, the spheroids were treated with 8 mM of ImmunoLPs during 96 h. The data is expressed as an average  $\pm$  SD (n = 3).

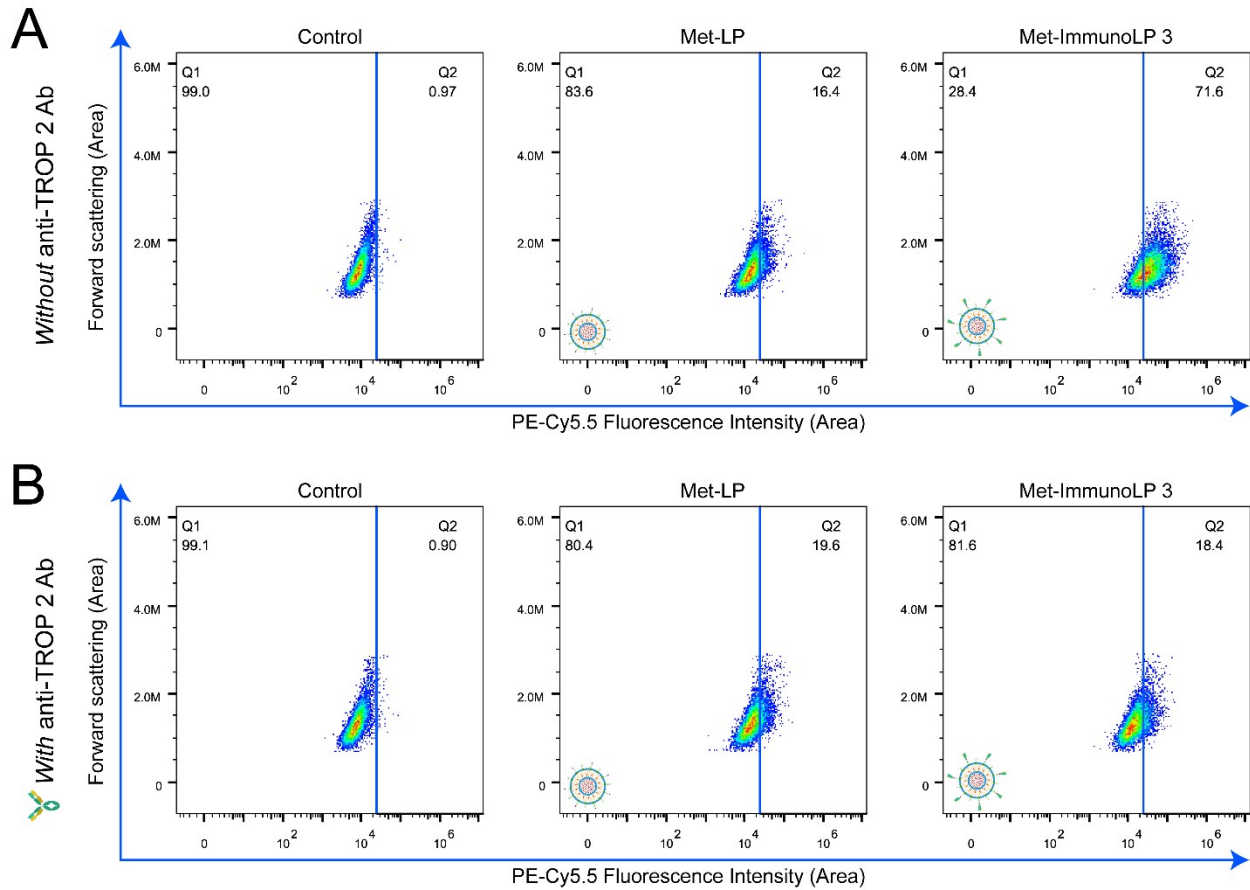

**Figure S3.** Flow cytometry results of MDA-MB-468 cells showing the cell population (9000 cells) distribution according to Cy5.5 fluorescence expression with or without prior TROP 2 blocking. The cells were treated with Met-LPs and Met-ImmunoLPs 3 during 24 h (lipid concentration – 2.5 mM). Cells incubated with Met-ImmunoLPs 3 without anti-TROP 2 antibody pre-incubation (**A**); cells incubated with Met-ImmunoLPs with anti-TROP 2 antibody pre-incubation (**B**).
